# Supplementary material for: Effect of swallowing related fatigue on eating and drinking behaviors across the age spectrum
Source: PeerJ. 2026 Jan 30;14:e20349. doi: 10.7717/peerj.20349 (PMC12863145; doi:10.7717/peerj.20349)
Supplement: Supplemental Information 1 [file peerj-14-20349-s001.xlsx]

## Sheet: Sheet1
Case Code	Age	Gender	SERF	FSS	EAT-10	DHI	Volumer per swallow	Time per swallow	Swallow Capacity	Discrete bites per cracker	Masticatory cycles per cracker	Swallows per cracker	Total Time	Masticatory cycles per bite	Swallows per bite	Time per bite	Time per masticatory cycle	Time per swallow	Safety Score	Efficacy Score	Meal Duration
HYA	20	Female	1	1	0	0	37.5	1.99	21.24	2	33	11	43.01	16.5	5.5	21.505	1.30333	3.91	0	0	10
HYA	22	Female	0	3.1	0	0	15	2.53	7.52	3	33	2	27.18	11	0.666667	9.06	0.823636	13.59	0	0	10
HYA	22	Female	6	1.3	0	2	16.6	1.73	7.94	4	42	6	35.53	10.5	1.5	8.8825	0.845952	5.92167	0	0	10
HYA	21	Female	8	1	2	2	15	2.45	13.46	2	19	3	19.89	9.5	1.5	9.945	1.04684	6.63	0	0	15
HYA	32	Male	0	1	0	0	25	1.74	22.9	2	38	2	28.41	19	1	14.205	0.747632	14.205	0	0	15
HYA	20	Male	4	1.2	0	0	21.42	2.5	11.96	2	29	2	22.41	14.5	1	11.205	0.772759	11.205	0	0	10
HYA	23	Female	7	3.1	0	2	30	1.24	23	1	27	3	26.15	27	3	26.15	0.968519	8.71667	16.66	11.11	10
HYA	25	Female	0	1	1	2	30	2.2	14.49	1	19	4	23.76	19	4	23.76	1.25053	5.94	0	0	7
HYA	20	Female	9	1	0	0	11.53	2.13	8.1	3	38	7	70.39	12.6667	2.33333	23.4633	1.85237	10.0557	0	0	10
HYA	21	Female	3	1.1	0	4	21.42	1.72	11.26	2	24	3	29.01	12	1.5	14.505	1.20875	9.67	0	0	8
HYA	21	Female	8	1	0	2	18.75	1.14	11.32	1	20	2	19.8	20	2	19.8	0.99	9.9	0	0	12
HYA	23	Male	11	3.4	3	2	21.42	1.16	14.15	2	31	3	34.73	15.5	1.5	17.365	1.12032	11.5767	8.33	5.55	15
HYA	20	Female	5	1.1	0	0	15	2.49	9.61	3	34	4	37	11.3333	1.33333	12.3333	1.08824	9.25
HYA	23	Female	0	1	0	0	18.75	1.34	14.92	1	28	5	27.78	28	5	27.78	0.992143	5.556
HYA	19	Female	0	1.1	2	2	18.75	1.44	20.6	2	26	4	25.3	13	2	12.65	0.973077	6.325	0	0	7
HYA	19	Female	0	1	1	0	15	1.71	15.7	3	23	2	21.45	7.66667	0.666667	7.15	0.932609	10.725	0	0	7
HYA	23	Female	8	1.1	0	0	15	1.63	11.3	1	15	5	18.07	15	5	18.07	1.20467	3.614	0	0	10
HYA	23	Female	11	2.6	1	4	50	2.2	16.05	2	21	5	27.03	10.5	2.5	13.515	1.28714	5.406	8.33	5.55	10
HYA	31	Male	13	3.4	2	0	50	2.59	20.8	2	32	7	35.85	16	3.5	17.925	1.12031	5.12143	8.33	11.11	15
HYA	35	Female	12	1.3	0	0	25	1.72	14.49	2	26	3	19.4	13	1.5	9.7	0.746154	6.46667	0	0	15
HYA	22	Female	13	2.2	3	2	21.42	1.95	10.98	1	27	4	35.47	27	4	35.47	1.3137	8.8675	0	0	10
HYA	37	Male	9	3.7	1	0	15	1.71	8.77	3	38	2	33.71	12.6667	0.666667	11.2367	0.887105	16.855	0	0	10
HYA	36	Male	10	2.2	2	2	6.81	1.37	4.96	2	21	3	24.65	10.5	1.5	12.325	1.17381	8.21667	0	0	10
HYA	36	Female	7	2	3	2	15	1.49	10	1	18	4	29.45	18	4	29.45	1.63611	7.3625	0	0	15
HYA	38	Male	10	3.7	2	4	21.42	1.83	11.68	2	16	3	20.32	8	1.5	10.16	1.27	6.77333	0	0	10
HYA	36	Female	14	1	0	0	15	1.08	13.77	3	56	5	40.59	18.6667	1.66667	13.53	0.724821	8.118	0	0	10
HYA	38	Female	12	1.7	0	0	30	1.51	19.78	3	29	2	28.53	9.66667	0.666667	9.51	0.983793	14.265	8.33	11.11	10
HYA	23	Male	9	3	0	0	25	1.36	18.33	2	20	3	23.68	10	1.5	11.84	1.184	7.89333	0	0	10
HYA	20	Female	3	1.5	0	0	75	2.01	37.22	2	19	2	21.2	9.5	1	10.6	1.11579	10.6	0	0	7
HYA	23	Female	6	1.4	3	4	21.42	1.37	15.57	2	59	2	43.3	29.5	1	21.65	0.733898	21.65	0	0	10
HYA	28	Male	0	1.1	1	0	21.42	2.22	9.64	1	22	2	28.1	22	2	28.1	1.27727	14.05	0	0	15
HYA	23	Male	7	2.4	2	2	30	1.71	17.54	1	13	2	12.73	13	2	12.73	0.979231	6.365	0	0	15
HYA	25	Male	13	3	2	4	50	1.65	30.24	1	16	1	18.16	16	1	18.16	1.135	18.16	0	0	10
HYA	23	Female	4	1	0	0	25	1.22	20.46	1	20	2	22.01	20	2	22.01	1.1005	11.005	0	0	15
HYA	24	Female	14	3.2	0	0	30	1.49	20.13	3	27	2	39.86	9	0.666667	13.2867	1.4763	19.93	0	0	15
HYA	27	Female	3	1	0	0	21.42	1.58	13.48	1	17	1	19.16	17	1	19.16	1.12706	19.16
HYA	29	Male	8	3.7	2	0	75	1.96	38.16					#DIV/0!	#DIV/0!	#DIV/0!	#DIV/0!	#DIV/0!	0	0	10
HYA	30	Female	1	1.3	0	0	21.42	1.37	15.59	2	15	3	21.96	7.5	1.5	10.98	1.464	7.32	0	0	15
HYA	26	Female	8	1.4	0	0	25	3.15	7.91	3	42	4	54.68	14	1.33333	18.2267	1.3019	13.67	8.33	5.55	8
HYA	32	Female	8	1.2	1	0	21.42	4.6	4.65	5	50	4	53.61	10	0.8	10.722	1.0722	13.4025	8.33	11.11	12
HYA	40	Male	8	1.4	2	4	15	2.14	6.99	6	47	6	51.02	7.83333	1	8.50333	1.08553	8.50333
HYA	34	Female	11	1.8	2	2	25	1.36	18.33	1	15	1	27.27	15	1	27.27	1.818	27.27
HYA	28	Male	7	1.3	0	0	25	1.23	20.18	1	20	1	15.48	20	1	15.48	0.774	15.48
HYA	39	Male	8	1	1	0	21.42	1.42	15.04	2	39	2	35.36	19.5	1	17.68	0.906667	17.68	8.3	5.55	14
HYA	21	Male	0	1	0	0	13.63	1.46	9.31	2	18	1	21.2	9	0.5	10.6	1.17778	21.2
HYA	35	Male	6	1.7	0	2	25	1.07	23.36	1	38	4	46.44	38	4	46.44	1.22211	11.61
HYA	35	Male	9	1.8	2	2	21.42	1.29	16.5	1	26	1	29.87	26	1	29.87	1.14885	29.87
HYA	37	Male	6	2	0	0	50	2.91	17.18	1	34	2	35.98	34	2	35.98	1.05824	17.99
HYA	34	Male	11	1.3	3	4	30	1.6	18.07	1	27	2	26.05	27	2	26.05	0.964815	13.025
HYA	28	Male	1	1.2	0	0	37.5	1.92	19.53	1	24	1	23.49	24	1	23.49	0.97875	23.49	0	0	5
HYA	28	Male	4	1.6	1	0	21.42	1.41	15.15	1	38	2	40.26	38	2	40.26	1.05947	20.13	0	0	10
HYA	28	Male	2	1.4	0	0	37.5	1.54	24.31	1	19	1	23.52	19	1	23.52	1.23789	23.52	0	0	10
HYA	22	Male	0	1	0	0	21.42	1.07	20.08	1	14	6	19.56	14	6	19.56	1.39714	3.26	0	0	5
HYA	20	Male	6	1	0	0	18.75	1.65	11.3	1	18	1	17.06	18	1	17.06	0.947778	17.06	0	0	5
HYA	21	Male	7	1.3	0	0	18.75	1.15	16.25	1	15	4	27.37	15	4	27.37	1.82467	6.8425	0	0	5
HYA	18	Female	12	1.7	0	0	30	2.41	12.4	1	25	3	28.94	25	3	28.94	1.1576	9.64667	0	0	5
HYA	24	Male	5	1.2	1	0	37.5	1.74	21.55	2	39	2	38.96	19.5	1	19.48	0.998974	19.48
HYA	24	Female	6	1.6	0	0	25	1.35	18.42	2	41	6	41.24	20.5	3	20.62	1.00585	6.87333
HYA	22	Female	9	1.7	1	2	37.5	1.44	25.99	1	21	3	27.24	21	3	27.24	1.29714	9.08
HYA	24	Female	0	1.4	1	0	30	1.71	17.46	1	48	3	50.94	48	3	50.94	1.06125	16.98	0	0	8
HYA	24	Female	0	1	0	0	37.5	2.21	16.94	3	35	1	32.31	11.6667	0.333333	10.77	0.923143	32.31
HYA	25	Female	8	1.5	2	4	30	2.09	14.29	1	19	2	20.58	19	2	20.58	1.08316	10.29
HYA	22	Female	10	1.6	0	4	21.42	1.23	17.4	2	25	2	25.38	12.5	1	12.69	1.0152	12.69	0	0	10
HYA	24	Male	12	1.5	2	2	30	1.4	21.42	1	41	1	27.36	41	1	27.36	0.667317	27.36	0	5.55	15
HYA	21	Female	0	1	0	0	18.75	2.15	8.7	2	32	2	42.1	16	1	21.05	1.31563	21.05
HYA	51	Female	9	1.7	1	2	37.5	3.08	12.14	2	29	2	29.58	14.5	1	14.79	1.02	14.79
HYA	39	Male	5	1.4	1	0	30	1.15	26.04	2	20	2	17.52	10	1	8.76	0.876	8.76
HYA	23	Female	5	1.1	0	0	25	1.9	13.14	3	48	2	39.68	16	0.666667	13.2267	0.826667	19.84
HYA	22	Female	3	1	0	0	21.42	1.15	18.54	2	34	2	29.74	17	1	14.87	0.874706	14.87
HYA	23	Female	0	1	0	0	30	2.46	12.16	3	24	3	30.45	8	1	10.15	1.26875	10.15
HYA	22	Female	9	1	1	2	25	1.75	14.24	2	19	1	19.96	9.5	0.5	9.98	1.05053	19.96
HYA	26	Male	7	2.1	0	0	37.5	1.49	25.04	1	24	1	23.48	24	1	23.48	0.978333	23.48
HYA	29	Male	12	1.8	3	2	25	1.18	21.12	2	17	1	23.42	8.5	0.5	11.71	1.37765	23.42
HYA	27	Male	6	1.8	0	0	50	2.22	22.72	1	23	1	17.91	23	1	17.91	0.778696	17.91
HYA	33	Male	11	2	0	0	30	1.79	16.7	1	20	2	19.59	20	2	19.59	0.9795	9.795
HYA	31	Male	7	2.1	2	0	50	3.43	14.57	1	37	1	24.06	37	1	24.06	0.65027	24.06	0	0	10
HYA	20	Male	0	1	0	0	15	1.66	8.6	2	15	2	24.71	7.5	1	12.355	1.64733	12.355
HYA	27	Male	13	2.1	2	0	13.63	1.43	9.51	1	34	3	26.9	34	3	26.9	0.791176	8.96667
HYA	20	Female	0	1.2	0	0	30	1.79	16.75	3	36	3	33.35	12	1	11.1167	0.926389	11.1167
HYA	21	Male	0	1.3	1	0	16.66	3.07	5.42	2	38	1	31.17	19	0.5	15.585	0.820263	31.17
HYA	20	Male	0	1	0	0	30	2	14.97	1	23	1	25.34	23	1	25.34	1.10174	25.34
HYA	20	Male	3	1.6	1	2	16.6	0.91	18.13	2	31	3	26.82	15.5	1.5	13.41	0.865161	8.94
HYA	24	Male	4	1.4	3	0	25	2.925	8.54	1	29	1	17.14	29	1	17.14	0.591034	17.14
HYA	25	Female	1	1.2	1	2	37.5	2.8	13.38	2	25	1	25.71	12.5	0.5	12.855	1.0284	25.71
HYA	20	Male	0	1	0	0	30	1.17	25.46	1	36	2	31.37	36	2	31.37	0.871389	15.685
HYA	19	Male	0	1	0	0	25	1.49	16.77	1	22	2	24.94	22	2	24.94	1.13364	12.47
HYA	18	Female	6	1	1	2	18.75	1.19	17.5	2	52	2	44.89	26	1	22.445	0.863269	22.445
HYA	19	Female	0	1	0	0	18.75	1.65	11.35	3	51	4	48.86	17	1.33333	16.2867	0.958039	12.215
HYA	19	Female	7	2	2	0	16.66	1.1	15.06	2	70	8	68	35	4	34	0.971429	8.5
HYA	19	Female	5	2.1	0	0	21.42	1.6	13.39	3	28	4	38.83	9.33333	1.33333	12.9433	1.38679	9.7075
HYA	19	Male	0	1	0	0	37.5	1.27	29.52	1	17	3	17.52	17	3	17.52	1.03059	5.84
HYA	19	Male	8	1	0	0	21.42	1.66	12.86	2	16	1	15.24	8	0.5	7.62	0.9525	15.24
HYA	20	Male	13	1.3	3	0	37.5	1.54	24.27	1	20	2	17.64	20	2	17.64	0.882	8.82
HYA	18	Female	10	1.5	2	2	37.5	2.07	18.07	1	26	2	37	26	2	37	1.42308	18.5
HYA	22	Female	8	2.3	1	0	13.63	1.31	10.4	3	65	5	75.39	21.6667	1.66667	25.13	1.15985	15.078
HYA	25	Female	0	2.8	0	0	21.42	2.22	9.65	2	31	4	38.11	15.5	2	19.055	1.22935	9.5275
HYA	24	Female	7	1.6	0	0	30	4.08	7.33	2	18	2	22.64	9	1	11.32	1.25778	11.32
HYA	24	Female	7	2.3	3	4	30	2.19	13.68	1	39	1	33.28	39	1	33.28	0.853333	33.28
HYA	22	Female	1	2	0	0	16.6	1.97	8.45	4	19	1	18.94	4.75	0.25	4.735	0.996842	18.94
HYA	20	Female	1	1	2	2	16.66	1.55	10.72	1	25	1	31.44	25	1	31.44	1.2576	31.44
HYA	40	Female	0	1	0	0	30	1.67	17.92	1	30	1	25.28	30	1	25.28	0.842667	25.28
HYA	22	Female	6	1.4	0	0	37.5	2.75	13.6	2	17	2	23.55	8.5	1	11.775	1.38529	11.775
HYA	23	Male	11	2.4	0	0	50	2.42	20.6	2	20	1	18.4	10	0.5	9.2	0.92	18.4
HYA	19	Female	8	2.1	0	0	18.75	3.54	5.29	2	24	1	26.11	12	0.5	13.055	1.08792	26.11
HYA	20	Female	12	2.8	0	0	21.42	1.29	16.61	1	29	2	23.66	29	2	23.66	0.815862	11.83
HYA	26	Male	0	1.1	0	0	25	1.23	20.21	1	18	1	18.69	18	1	18.69	1.03833	18.69	0	0	10
HYA	26	Male	0	1	0	0	50	3.03	16.46	1	22	7	26.64	22	7	26.64	1.21091	3.80571
HYA	35	Male	7	1.1	2	4	21.42	2.13	10.06	1	25	2	26.25	25	2	26.25	1.05	13.125
HYA	27	Male	10	3.5	2	0	25	1.19	20.97	1	33	1	23.42	33	1	23.42	0.709697	23.42
HYA	25	Female	9	2	3	2	18.75	1.41	13.29	1	27	4	30.49	27	4	30.49	1.12926	7.6225
HYA	26	Female	8	1.5	2	0	50	1.53	32.67	2	27	1	21.55	13.5	0.5	10.775	0.798148	21.55
HYA	30	Female	7	1.4	3	2	30	1.76	17.04	1	21	1	14.42	21	1	14.42	0.686667	14.42
HYA	31	Male	2	1.1	1	0	37.5	1.52	24.54	2	23	1	26.52	11.5	0.5	13.26	1.15304	26.52
HYA	31	Male	4	2.1	0	0	12.5	1.08	11.54	2	28	1	30.18	14	0.5	15.09	1.07786	30.18
HYA	30	Female	0	1	0	0	25	1.09	22.76	1	15	2	28.36	15	2	28.36	1.89067	14.18
HYA	32	Female	9	1.4	2	4	25	0.95	26.08	1	22	2	26.64	22	2	26.64	1.21091	13.32
HYA	30	Female	4	1.1	2	0	30	1.33	22.45	2	36	2	40.42	18	2	40.42	1.12278	20.21
HYA	34	Male	4	1.6	2	0	50	2.75	18.18	2	17	1	18.66	8.5	0.5	9.33	1.09765	18.66
HYA	38	Male	7	1.7	2	0	30	3.67	13.59	1	30	2	26.89	30	2	26.89	0.896333	13.445
HYA	28	Male	3	1.1	1	0	16.66	1.3	12.73	2	43	1	35.71	21.5	0.5	17.855	0.830465	35.71
HYA	40	Male	8	1.8	1	0	30	1.5	19.92	1	18	1	18.85	18	1	18.85	1.04722	18.85
HYA	34	Male	0	1	0	0	37.5	3.64	10.3	1	32	1	28.04	32	1	28.04	0.87625	28.04
HYA	38	Male	11	1.4	1	0	37.5	1.16	25.77	1	53	1	39.54	53	1	39.54	0.746038	39.54
HYA	27	Male	4	1.2	0	0	37.5	2.76	13.58	1	27	2	24.99	27	2	24.99	0.925556	12.495
HYA	27	Male	9	2	3	4	25	1.59	15.72	2	26	1	23.46	13	0.5	11.73	0.902308	23.46
HYA	28	Male	0	1.1	0	0	50	2.57	19.43	1	25	2	24.61	25	2	24.61	0.9844	12.305
HYA	19	Male	0	1	0	0	37.5	1.38	27.12	1	31	3	30.42	31	3	30.42	0.98129	10.14
HMA	41	Female	0	1.6	0	0	25	1.53	27.8	3	24	2	19.65	8	0.666667	6.55	0.81875	9.825
HMA	57	Male	14	2.2	3	0	25	1.86	9.5	2	31	3	23.42	15.5	1.5	11.71	0.755484	7.80667	25	27.77	24
HMA	52	Female	8	3.8	2	0	18.75	1.74	6.8	3	42	3	37.78	14	1	12.5933	0.899524	12.5933	0	0	20
HMA	52	Female	4	3.4	0	0	30	2.81	10.67	4	41	4	47.58	10.25	1	11.895	1.16049	11.895	0	11.11	15
HMA	42	Male	6	2.1	3	2	37.5	1.89	19.78	2	25	2	28.94	12.5	1	14.47	1.1576	14.47	0	0	15
HMA	56	Female	10	1	0	0	21.42	1.3	16.48	3	44	2	31.9	14.6667	0.666667	10.6333	0.725	15.95	8.33	5.55	15
HMA	52	Male	11	1.6	2	0	25	1.93	12.93	2	41	5	45.48	20.5	2.5	22.74	1.10927	9.096	8.33	11.11	15
HMA	46	Female	0	1	0	0	25	1.59	15.72	2	31	4	36.1	15.5	2	18.05	1.16452	9.025	0	0	15
HMA	52	Male	2	1	0	0	15	2.25	6.64	6	49	3	38.99	8.16667	0.5	6.49833	0.795714	12.9967	0	0	15
HMA	58	Male	3	1	0	2	30	3.5	8.56	1	27	1	33.99	27	1	33.99	1.25889	33.99	16.66	16.66	20
HMA	56	Female	6	2.8	3	0	50	2.04	24.46	1	26	3	21.46	26	3	21.46	0.825385	7.15333	0	0	10
HMA	52	Male	0	1	0	0	25	2.14	11.68	1	21	1	24.58	21	1	24.58	1.17048	24.58	0	0	10
HMA	48	Female	0	1	0	0	25	2.1	11.87	2	27	2	30.32	13.5	1	15.16	1.12296	15.16	0	0	12
HMA	58	Male	9	2.6	1	2	37.5	1.65	22.69	1	37	2	37.24	37	2	37.24	1.00649	18.62	0	5.55	10
HMA	49	Female	1	1	0	0	21.42	1.11	19.28	2	27	2	26.8	13.5	1	13.4	0.992593	13.4	0	0	7
HMA	50	Male	12	1.5	1	2	21.42	1.95	10.97	4	39	2	34.63	9.75	0.5	8.6575	0.887949	17.315	8.33	11.11	15
HMA	46	Female	14	2.3	1	2	21.42	2.32	9.2	1	21	3	21.61	21	3	21.61	1.02905	7.20333	8.33	5.55	12
HMA	51	Female	3	1.2	0	0	37.5	2.39	15.65	1	13	2	15.36	13	2	15.36	1.18154	7.68
HMA	43	Female	6	2.2	0	0	25	1.95	12.82	1	24	1	24.13	24	1	24.13	1.00542	24.13
HMA	40	Male	8	1.4	2	4	15	2.14	6.99	6	47	6	51.02	7.83333	1	8.50333	1.08553	8.50333
HMA	53	Female	0	1	3	0	25	1.62	15.36	1	29	3	30.87	29	3	30.87	1.06448	10.29
HMA	54	Female	14	1.5	2	0	30	1.3	23	5	57	4	43.78	11.4	0.8	8.756	0.76807	10.945	16.66	11.11	15
HMA	52	Female	10	1.5	2	2	30	1.55	19.3	1	19	2	19.05	19	2	19.05	1.00263	9.525	8.33	5.55	15
HMA	53	Female	5	1.3	2	2	30	1.12	26.69	1	32	2	30.4	32	2	30.4	0.95	15.2
HMA	51	Female	8	1.5	1	0	37.5	2.7	13.88	1	37	3	29.04	37	3	29.04	0.784865	9.68
HMA	55	Male	11	1.7	1	2	30	3.81	7.86	1	37	2	37.74	37	2	37.74	1.02	18.87
HMA	51	Female	7	1.3	0	0	30	1.84	16.26	1	24	3	25.41	24	3	25.41	1.05875	8.47
HMA	59	Female	8	1.8	3	0	21.42	1.2	17.83	1	18	2	25.93	18	2	25.93	1.44056	12.965
HMA	57	Female	7	1.5	3	0	16.6	2.21	7.5	1	34	1	39.5	34	1	39.5	1.16176	39.5	0	0	12
HMA	58	Female	5	2.2	2	2	37.5	3.06	12.23	1	28	2	35.42	28	2	35.42	1.265	17.71
HMA	54	Male	12	2.1	2	0	30	1.26	23.65	1	39	5	55.75	39	5	55.75	1.42949	11.15	0	0	10
HMA	47	Female	13	2.1	1	2	25	1.47	16.91	1	35	3	44.16	35	3	44.16	1.26171	14.72
HMA	58	Male	10	2.4	3	2	18.75	1.41	13.21	1	29	3	28.5	29	3	28.5	0.982759	9.5
HMA	41	Male	14	1.8	2	0	25	1.1	22.55	1	36	5	36.39	36	5	36.39	1.01083	7.278
HMA	41	Female	7	3.4	1	2	30	3.35	8.94	2	31	3	32.9	15.5	1.5	16.45	1.06129	10.9667	8.33	5.55	17
HMA	51	Female	9	1.7	1	2	37.5	3.08	12.14	2	29	2	29.58	14.5	1	14.79	1.02	14.79
HMA	55	Male	12	3	2	4	37.5	2.8	13.39	1	19	1	14.46	19	1	14.46	0.761053	14.46
HMA	52	Female	11	2.1	3	2	25	1.4	17.81	1	29	1	24.94	29	1	24.94	0.86	24.94
HMA	45	Female	9	1.8	3	0	37.5	1.93	19.37	4	42	3	37.96	10.5	0.75	9.49	0.90381	12.6533
HMA	44	Male	10	3.4	2	2	13.63	1.71	7.97	3	62	4	65.85	20.6667	1.33333	21.95	1.0621	16.4625
HMA	48	Female	7	2.4	3	4	37.5	2.24	16.7	6	72	4	73.62	12	0.666667	12.27	1.0225	18.405
HMA	48	Female	11	3	1	0	10	2.53	3.93	5	47	5	59.96	9.4	1	11.992	1.27574	11.992
HMA	54	Male	9	2.5	2	2	50	5.72	8.73	1	31	1	23.04	31	1	23.04	0.743226	23.04
HMA	47	Female	3	2.1	2	2	13.63	2.33	5.84	2	36	2	25.2	18	1	12.6	0.7	12.6
HMA	40	Female	0	1	0	0	30	1.67	17.92	1	30	1	25.28	30	1	25.28	0.842667	25.28	0	0	10
HMA	45	Male	0	1	0	0	37.5	1.53	24.42	1	22	2	22.8	22	2	22.8	1.03636	11.4	0	0	15
HMA	43	Female	0	1.5	0	0	50	2.78	17.98	2	27	1	25.49	13.5	0.5	12.745	0.944074	25.49	0	0	12
HMA	53	Male	5	3.7	1	2	8.33	3.54	2.35	5	25	1	28.4	5	0.2	5.68	1.136	28.4	0	0	15
HMA	40	Male	8	1.8	1	0	30	1.5	19.92	1	18	1	18.85	18	1	18.85	1.04722	18.85	0	0	15
HMA	44	Female	9	1.4	1	0	37.5	2.21	16.96	2	30	4	26.82	15	2	13.41	0.894	6.705
HMA	43	Male	8	1.1	3	2	37.5	2.22	16.85	1	25	2	22.22	25	2	22.22	0.8888	11.11	0	0	17
HMA	46	Female	11	1.7	0	0	37.5	2.44	15.32	3	41	3	30.82	13.6667	1	10.2733	0.751707	10.2733
HMA	49	Male	9	1.6	0	0	50	4.49	11.11	1	28	1	24.37	28	1	24.37	0.870357	24.37
HMA	50	Female	8	1.5	1	2	21.42	1.61	13.23	2	43	1	40.91	21.5	0.5	20.455	0.951395	40.91
HMA	49	Female	10	1.5	3	0	18.75	1.61	11.63	2	24	1	37.69	12	0.5	18.845	1.57042	37.69
HMA	48	Male	8	1.4	3	0	18.75	1.41	13.21	1	29	3	28.5	29	3	28.5	0.982759	9.5
HMA	43	Female	3	1	2	0	25	1.53	27.8	3	24	2	19.65	8	0.666667	6.55	0.81875	9.825
HMA	47	Male	0	1	0	0	37.5	1.53	24.42	1	22	2	22.8	22	2	22.8	1.03636	11.4
HMA	47	Male	7	1.2	3	2	18.75	1.87	9.99	5	43	3	43.18	8.6	0.6	8.636	1.00419	14.3933
HMA	42	Female	3	1.4	2	0	37.5	2.21	16.96	2	30	4	26.82	15	2	13.41	0.894	6.705
HMA	55	Male	8	2.2	0	0	37.5	1.41	26.59	1	41	2	31.93	41	2	31.93	0.77878	15.965
HMA	52	Female	10	1.8	0	0	15	1.81	8.26	3	48	3	42.92	16	1	14.3067	0.894167	14.3067	0	16.66	15
HMA	44	Female	5	1	0	0	30	2.54	11.8	2	33	1	32.29	16.5	0.5	16.145	0.978485	32.29	0	0	10
HMA	48	Male	10	1.3	2	0	50	2.48	20.13	1	26	1	22.97	26	1	22.97	0.883462	22.97
HMA	48	Male	10	1.4	0	0	50	2	24.95	1	33	1	20.17	33	1	20.17	0.611212	20.17
HMA	44	Male	12	1.4	0	0	50	2.35	16.79	2	37	2	31.24	18.5	1	15.62	0.844324	15.62
HMA	48	Female	14	2.2	3	2	50	4.42	11.31	1	21	3	31.39	21	3	31.39	1.49476	10.4633	8.33	0	10
HMA	41	Female	7	1.2	3	4	25	2.44	10.21	4	54	2	50.43	13.5	0.5	12.6075	0.933889	25.215	25	44.44	20
HMA	58	Female	6	2.4	0	0	16.66	2.71	6.14	5	54	4	72.64	10.8	0.8	14.528	1.34519	18.16	0	11.11	15
HMA	48	Male	0	1	0	0	18.75	1.48	12.66	1	29	1	22.14	29	1	22.14	0.763448	22.14	0	0	7
HMA	49	Female	7	1.3	0	0	16.66	1.51	10.98	3	45	6	68.55	15	2	22.85	1.52333	11.425
HMA	48	Female	1	1	0	0	25	1.09	22.76	1	15	2	28.36	15	2	28.36	1.89067	14.18
HMA	45	Female	12	2.1	3	0	21.42	1.29	16.61	1	29	2	23.66	29	2	23.66	0.815862	11.83	0	5.55	15
HMA	56	Female	9	1.7	3	2	37.5	2.07	18.11	3	38	4	42.79	12.6667	1.33333	14.2633	1.12605	10.6975	8.33	0	10
HMA	43	Female	6	1.8	0	0	37.5	3.08	12.14	2	29	2	29.58	14.5	1	14.79	1.02	14.79	0	0	12
HMA	46	Male	9	1.7	1	0	30	1.15	26.04	2	20	2	17.52	10	1	8.76	0.876	8.76	0	0	12
HMA	41	Female	7	1.9	1	0	25	1.36	18.33	1	15	1	27.27	15	1	27.27	1.818	27.27	0	0	15
HMA	58	Male	3	1.2	1	2	50	2	24.95	1	33	1	20.17	33	1	20.17	0.611212	20.17
HMA	43	Female	2	1	0	0	30	1.33	22.45	2	36	2	40.42	36	2	40.42	1.12278	20.21
HMA	41	Male	11	1.7	1	0	37.5	3.64	10.3	1	32	1	28.04	32	1	28.04	0.87625	28.04
HMA	46	Male	7	1.1	0	2	30	1.79	16.7	1	20	2	19.59	20	2	19.59	0.9795	9.795
HMA	45	Male	7	1	0	0	50	2.59	20.8	2	32	7	35.85	16	3.5	17.925	1.12031	5.12143	25	11.11	15
HMA	41	Female	12	1.1	3	4	21.42	4.6	4.65	5	50	4	53.61	10	0.8	10.722	1.0722	13.4025
HMA	44	Male	14	2.8	2	2	15	2.14	6.99	6	47	6	51.02	7.83333	1	8.50333	1.08553	8.50333
HMA	42	Male	11	1	2	0	30	1.5	19.92	1	18	1	18.85	18	1	18.85	1.04722	18.85	0	0	15
HMA	45	Female	7	2.1	2	2	30	1.67	17.92	1	30	1	25.28	30	1	25.28	0.842667	25.28
HMA	49	Female	5	1.9	0	0	21.42	1.61	13.23	2	43	1	40.91	21.5	0.5	20.455	0.951395	40.91
HMA	45	Female	7	1.8	0	0	25	1.22	20.46	1	20	2	22.01	20	2	22.01	1.1005	11.005	0	0	15
HMA	44	Female	7	1.6	1	0	15	1.63	11.3	1	15	5	18.07	15	5	18.07	1.20467	3.614	0	0	10
HMA	48	Female	6	2.7	0	0	25	3.15	7.91	3	42	4	54.68	14	1.33333	18.2267	1.3019	13.67
HMA	48	Female	10	2.2	2	4	25	1.36	18.33	1	15	1	27.27	15	1	27.27	1.818	27.27
HMA	50	Male	12	3.6	0	0	30	1.79	16.7	1	20	2	19.59	20	2	19.59	0.9795	9.795
HMA	56	Male	0	2	0	0	37.5	1.65	22.69	1	37	2	37.24	37	2	37.24	1.00649	18.62
HMA	43	Male	0	2.1	0	0	50	2.59	20.8	2	32	7	35.85	16	3.5	17.925	1.12031	5.12143	25	11.11	15
HMA	57	Female	11	1.6	0	2	21.42	1.3	16.48	3	44	2	31.9	14.6667	0.666667	10.6333	0.725	15.95	0	0	10
HMA	53	Female	8	3.4	3	0	37.5	3.08	12.14	2	29	2	29.58	14.5	1	14.79	1.02	14.79	0	0	15
HMA	58	Female	11	2.9	2	0	30	1.55	19.3	1	19	2	19.05	19	2	19.05	1.00263	9.525
HMA	48	Female	1	1.2	0	0	25	1.95	12.82	1	24	1	24.13	24	1	24.13	1.00542	24.13
HMA	58	Female	3	1.6	1	0	37.5	2	18.75	1	28	2	23.87	28	2	23.87	0.8525	11.935
HMA	41	Female	7	2	2	2	25	1.9	13.14	3	48	2	39.68	16	0.666667	13.2267	0.826667	19.84
HMA	58	Female	9	1.8	3	0	21.42	2.26	11.45	1	27	3	27.66	27	3	27.66	1.02444	9.22
HMA	42	Female	15	2.3	0	0	16.66	1.13	14.64	3	41	3	52.01	13.6667	1	17.3367	1.26854	17.3367
HMA	43	Male	10	3.9	3	0	15	2.14	6.99	6	47	6	51.02	7.83333	1	8.50333	1.08553	8.50333
HMA	42	Male	3	2.1	3	2	30	3.81	7.86	1	37	2	37.74	37	2	37.74	1.02	18.87
HMA	52	Male	13	1.2	3	2	21.42	3.65	5.85	3	47	4	45.05	15.6667	1.33333	15.0167	0.958511	11.2625	0	0	22
HMA	44	Male	1	1	0	0	25	2.05	12.15	1	25	2	40.1	25	2	40.1	1.604	20.05
HMA	48	Female	5	2.2	1	0	21.42	1.11	19.28	2	27	2	26.8	13.5	1	13.4	0.992593	13.4
HMA	54	Male	4	1.9	3	2	25	1.2	20.71	1	33	3	33.7	33	3	33.7	1.02121	11.2333	0	0	18
HMA	57	Male	5	1.4	0	0	50	2.48	20.13	1	26	1	22.97	26	1	22.97	0.883462	22.97	0	0	20
HMA	47	Male	4	1	0	0	37.5	2.51	14.91	1	26	1	23.74	26	1	23.74	0.913077	23.74
HMA	55	Female	3	1.7	1	2	37.5	2.24	16.7	6	72	4	73.62	12	0.666667	12.27	1.0225	18.405
HMA	52	Female	13	2	0	0	13.63	2.33	5.84	2	36	2	25.2	18	1	12.6	0.7	12.6
HMA	48	Female	1	2.8	0	0	18.75	1.55	12.02	5	49	5	60	9.8	1	12	1.22449	12
HMA	50	Female	9	3.4	1	2	16.66	1.51	10.98	3	45	6	68.55	15	2	22.85	1.52333	11.425	0	5.55	13
HMA	41	Female	9	1	0	0	25	1.53	27.8	3	24	2	19.65	8	0.666667	6.55	0.81875	9.825
HMA	47	Female	12	2.6	3	4	21.42	2.32	9.2	1	21	3	21.61	21	3	21.61	1.02905	7.20333
HMA	46	Female	10	1.2	1	0	37.5	3.06	12.23	1	28	2	35.42	28	2	35.42	1.265	17.71
HMA	42	Female	13	1.6	1	0	15	1.81	8.26	3	48	3	42.92	16	1	14.3067	0.894167	14.3067
HMA	42	Male	7	1.1	0	0	18.75	1.87	9.99	5	43	3	43.18	8.6	0.6	8.636	1.00419	14.3933
HMA	52	Female	4	1.3	0	0	50	2.04	24.46	1	26	3	21.46	26	3	21.46	0.825385	7.15333
HMA	41	Female	6	1	0	0	16.66	2.35	7.07	3	61	4	59.44	20.3333	1.33333	19.8133	0.974426	14.86
HMA	59	Male	14	2.7	2	0	18.75	1.48	12.66	1	29	1	22.14	29	1	22.14	0.763448	22.14	0	5.55	14
HMA	50	Female	13	1.9	2	2	16.66	1.06	15.67	1	29	3	26.98	29	3	26.98	0.930345	8.99333
HMA	51	Male	8	1	0	0	37.5	3.1	12.08	3	38	1	26.38	12.6667	0.333333	8.79333	0.694211	26.38
HOA	69	Male	16	3.9	0	0	10.71	3	7.09	1	46	5	33.39	46	5	33.39	0.72587	6.678	0	16.66	20
HOA	67	Female	12	2.4	2	0	21.42	2.26	11.45	1	27	3	27.66	27	3	27.66	1.02444	9.22	8.33	11.11	25
HOA	66	Male	10	3.1	0	0	13.63	2	10.41	2	57	6	47.4	28.5	3	23.7	0.831579	7.9	16.66	5.55	17
HOA	62	Female	17	3.2	2	2	30	2.83	9.35	2	47	5	38.47	23.5	2.5	19.235	0.818511	7.694	8.33	11.11	23
HOA	81	Female	9	5.1	9	34	25	3.18	9.2	3	55	5	59.89	18.3333	1.66667	19.9633	1.08891	11.978	25	44.44	35
HOA	92	Male	12	1.8	7	4	50	1.99	25.12	1	37	4	48.17	37	4	48.17	1.30189	12.0425	41.66	44.44	35
HOA	78	Male	13	3.1	1	2	30	10.14	2.95	1	58	7	69.3	58	7	69.3	1.19483	9.9
HOA	65	Female	14	2.6	1	2	25	2.39	10.42	1	53	2	42.46	53	2	42.46	0.801132	21.23
HOA	71	Male	2				18.75	2.17	8.64	1	53	2	36.23	53	2	36.23	0.683585	18.115
HOA	63	Female	0	1.1	0	4	25	2.19	11.39	2	55	2	55.23	27.5	1	27.615	1.00418	27.615
HOA	72	Female	13	2.2	0	4	18.75	1.46	12.76	3	57	2	51.57	19	0.666667	17.19	0.904737	25.785	8.33	5.55	17
HOA	76	Female	5	1.1	0	2	25	2.43	10.25	1	33	3	52.18	33	3	52.18	1.58121	17.3933	0	0	15
HOA	80	Female	20	2.8	7	10	30	3.18	9.41	3	77	5	93.83	25.6667	1.66667	31.2767	1.21857	18.766	16.66	33.33	20
HOA	76	Male	8	2.6	3	4	15	1.72	8.7	4	37	2	38.65	9.25	0.5	9.6625	1.04459	19.325	8.33	5.55	15
HOA	74	Male	4	1.4	0	4	37.5	1.99	18.82	1	38	2	28.26	38	2	28.26	0.743684	14.13	0	5.55	20
HOA	84	Male	19	3.3	3	2	18.75	1.87	10.02	2	45	2	35.1	22.5	1	17.55	0.78	17.55	33.33	33.33	20
HOA	68	Female	9	2.8	6	10	25	1.66	15	1	35	2	37.37	35	2	37.37	1.06771	18.685
HOA	85	Female	9	1.8	3	4	15	1.53	9.8	4	61	3	59.64	15.25	0.75	14.91	0.977705	19.88	33.33	38.88	25
HOA	77	Female	4				13.63	1.99	6.83	2	68	2	48.5	34	1	24.25	0.713235	24.25
HOA	62	Male	9	2.3	0	0	50	1.77	28.14	1	27	1	16.96	27	1	16.96	0.628148	16.96	8.33	11.11	10
HOA	67	Male	0				37.5	1.66	22.52	1	37	1	36.6	37	1	36.6	0.989189	36.6
HOA	64	Female	0				15	1.89	7.93	1	48	4	47.47	48	4	47.47	0.988958	11.8675
HOA	62	Male	18	1.8	1	0	18.75	1.96	9.53	3	30	6	41.02	10	2	13.6733	1.36733	6.83667
HOA	61	Female	10	1.7	3	2	16.66	1.38	12	3	33	3	27.36	11	1	9.12	0.829091	9.12
HOA	73	Female	20	4.1	5	10	37.5	2.19	17.06	2	25	2	37.59	12.5	1	18.795	1.5036	18.795
HOA	69	Male	12	1.5	3	4	30	2.79	10.72	3	41	5	42.21	13.6667	1.66667	14.07	1.02951	8.442
HOA	75	Female	9	3.2	3	4	25	2.24	11.13	2	27	2	34.95	13.5	1	17.475	1.29444	17.475	0	11.11	15
HOA	80	Female	24	5	7	10	18.75	2.33	8.03	1	57	3	62.77	57	3	62.77	1.10123	20.9233	33.33	38.88	25
HOA	86	Male	14	5.7	9	16	13.63	2.04	6.67	2	40	1	41.06	20	0.5	20.53	1.0265	41.06	33.33	50	25
HOA	61	Male	10	1.6	3	0	37.5	1.54	24.35	1	25	2	27.94	25	2	27.94	1.1176	13.97	0	0	15
HOA	84	Male	13	3.2	2	4	18.75	4.35	4.3	1	39	4	37.79	39	4	37.79	0.968974	9.4475	33.33	27.77	20
HOA	85	Male	27	4	7	10	21.42	1.5	14.25	3	61	2	46.21	20.3333	0.666667	15.4033	0.757541	23.105	50	44.44	22
HOA	75	Female	10	2.6	3	4	37.5	2.07	18.11	3	38	4	42.79	12.6667	1.33333	14.2633	1.12605	10.6975	8.33	16.66	10
HOA	64	Female	8	2.2	2	4	18.75	1.22	15.25	1	21	2	24.87	21	2	24.87	1.18429	12.435	0	0	10
HOA	70	Female	12	4	4	12	16.66	1.13	14.64	3	41	3	52.01	13.6667	1	17.3367	1.26854	17.3367	8.33	16.66	15
HOA	71	Male	16	3.3	6	12	50	3.28	15.24	1	27	3	26.18	27	3	26.18	0.96963	8.72667	25	38.88	15
HOA	70	Male	12	3.3	2	4	37.5	2.08	18.02	1	33	1	29.55	33	1	29.55	0.895455	29.55	8.33	11.11	10
HOA	61	Female	9	1.6	0	0	30	2.54	11.8	2	33	1	32.29	16.5	0.5	16.145	0.978485	32.29	0	5.55	10
HOA	61	Female	10	3.5	3	2	15	1.81	8.26	3	48	3	42.92	16	1	14.3067	0.894167	14.3067	0	16.66	15
HOA	69	Female	34	4.5	9	16	37.5	4.16	9	2	43	2	43.77	21.5	1	21.885	1.01791	21.885	50	50	20
HOA	69	Male	12	3.1	3	2	30	1.51	19.84	1	40	2	36.45	40	2	36.45	0.91125	18.225	16.66	22.22	15
HOA	71	Male	26	3.1	1	4	37.5	2.69	13.94	1	30	2	21.15	30	2	21.15	0.705	10.575	25	50	15
HOA	63	Female	14	2	2	4	50	4.42	11.31	1	21	3	31.39	21	3	31.39	1.49476	10.4633	8.33	16.66	10
HOA	68	Female	24	3.6	9	16	37.5	3.16	11.84	1	55	7	68.46	55	7	68.46	1.24473	9.78	25	38.88	23
HOA	62	Male	17	3.7	3	4	37.5	3.34	11.2	3	45	3	44.11	15	1	14.7033	0.980222	14.7033	16.66	27.77	10
HOA	66	Female	13	1.7	7	14	16.66	1.56	10.66	1	47	2	50.39	47	2	50.39	1.07213	25.195	25	16.66	15
HOA	65	Female	10	1.5	3	0	25	1.88	13.23	2	35	2	31.89	17.5	1	15.945	0.911143	15.945	0	0	10
HOA	80	Male	29	4.5	6	12	37.5	2.14	17.46	1	29	2	31.38	29	2	31.38	1.08207	15.69	33.33	44.44	25
HOA	75	Female	16	4	2	4	18.75	1.69	11.03	4	59	3	83	14.75	0.75	20.75	1.40678	27.6667	25	33.33	20
HOA	64	Male	9	3.5	8	22	30	2.09	14.32	2	35	1	37.81	17.5	0.5	18.905	1.08029	37.81	16.66	38.88	15
HOA	61	Female	4	3.7	5	10	25	2.44	10.21	4	54	2	50.43	13.5	0.5	12.6075	0.933889	25.215	25	44.44	20
HOA	72	Female	14	3.2	2	8	13.63	1.93	7.04	4	52	2	49	13	0.5	12.25	0.942308	24.5	8.33	11.11	10
HOA	62	Female	8	2.5	2	2	16.66	2.71	6.14	5	54	4	72.64	10.8	0.8	14.528	1.34519	18.16	25	33.33	15
HOA	79	Male	20	3.7	9	16	30	3.22	9.31	1	34	1	31.88	34	1	31.88	0.937647	31.88
HOA	64	Male	8	2.8	1	4	21.42	3.65	5.85	3	47	4	45.05	15.6667	1.33333	15.0167	0.958511	11.2625
HOA	73	Male	14	3.7	9	14	25	2.05	12.15	1	25	2	40.1	25	2	40.1	1.604	20.05
HOA	67	Female	6	3.3	5	8	25	3.1	8.05	1	16	2	35.27	16	2	35.27	2.20438	17.635
HOA	61	Male	8	2.4	0	0	25	2.24	11.13	5	34	1	40.66	6.8	0.2	8.132	1.19588	40.66
HOA	62	Female	9	2.6	0	2	15	1.84	8.13	6	38	2	41.2	6.33333	0.333333	6.86667	1.08421	20.6
HOA	85	Female	32	5	12	30	37.5	2.03	18.4	3	82	2	73.28	27.3333	0.666667	24.4267	0.893659	36.64	41.66	61.11	25
HOA	80	Female	10	3.8	2	2	25	1.45	17.16	3	49	3	42.32	16.3333	1	14.1067	0.863673	14.1067	33.33	27.77	25
HOA	75	Male	9	3.4	2	2	30	1.21	24.75	1	39	2	36.19	39	2	36.19	0.927949	18.095
HOA	78	Male	19	2.9	4	12	25	3.19	7.81	2	56	3	61.89	28	1.5	30.945	1.10518	20.63
HOA	79	Female	27	4.3	7	18	18.75	2.44	7.68	6	119	9	165.07	19.8333	1.5	27.5117	1.38714	18.3411
HOA	75	Female	10	2.5	3	4	12.5	2	6.22	5	86	6	81.8	17.2	1.2	16.36	0.951163	13.6333
HOA	87	Female	23	4.4	10	22	18.75	4.1	4.49	5	87	3	58.02	17.4	0.6	11.604	0.666897	19.34
HOA	91	Female	21	4.3	2	4	16.6	2.13	7.81	4	65	3	71.78	16.25	0.75	17.945	1.10431	23.9267
HOA	72	Female	10	2.6	27	62	18.75	1.55	12.02	5	49	5	60	9.8	1	12	1.22449	12
HOA	83	Male	20	2.3	7	20	50	4.13	12.08	2	105	4	72.65	52.5	2	36.325	0.691905	18.1625
HOA	76	Female	8	2.3	1	0	18.75	2.09	8.94	1	65	2	52.77	65	2	52.77	0.811846	26.385
HOA	83	Female	8	2.5	3	4	16.66	2.22	7.5	4	39	4	44.61	9.75	1	11.1525	1.14385	11.1525
HOA	80	Female	18	2.2	2	4	50	6.8	7.35	3	69	3	62.06	23	1	20.6867	0.89942	20.6867
HOA	88	Female	14	3.3	5	12	37.5	4.67	8.02	2	70	3	60.91	35	1.5	30.455	0.870143	20.3033	33.33	27.77	22
HOA	79	Male	10	3.8	7	24	7.89	2.56	3.08	2	50	6	60.42	25	3	30.21	1.2084	10.07
HOA	83	Female	17	2.8	1	2	9.37	1.63	5.73	5	82	4	64.09	16.4	0.8	12.818	0.781585	16.0225
HOA	77	Female	10	2.8	6	20	25	3.86	6.46	1	49	2	40.67	49	2	40.67	0.83	20.335
HOA	77	Female	10	3.7	13	22	11.53	7.61	1.51	8	110	6	82.91	13.75	0.75	10.3637	0.753727	13.8183	33.33	33.33	20
HOA	81	Male	8	2.7	2	2	21.42	4.08	5.24	1	38	2	35.09	38	2	35.09	0.923421	17.545
HOA	70	Female	9	2.5	1	4	37.5	3.06	12.25	1	36	3	37.2	36	3	37.2	1.03333	12.4
HOA	67	Female	0	1.1	0	0	75	3.57	21	1	26	2	30.76	26	2	30.76	1.18308	15.38
HOA	62	Female	1	1.1	1	0	75	3.53	21.24	2	47	4	51.53	23.5	2	25.765	1.09638	12.8825
HOA	80	Female	18	3.8	3	2	37.5	3.14	11.91	7	58	2	53.66	8.28571	0.285714	7.66571	0.925172	26.83
HOA	70	Female	15	3.7	14	26	18.75	3.91	4.82	3	52	3	60.98	17.3333	1	20.3267	1.17269	20.3267
HOA	75	Female	22	3.4	7	8	21.42	1.7	12.6	5	69	4	81.87	13.8	0.8	16.374	1.18652	20.4675
HOA	60	Female	0	2.4	1	2	16.66	1.51	10.98	3	45	6	68.55	15	2	22.85	1.52333	11.425
HOA	62	Female	0	1.6	0	2	30	2.35	12.74	3	25	2	28.04	8.33333	0.666667	9.34667	1.1216	14.02
HOA	62	Male	8	2.8	0	0	30	4.51	6.64	4	51	4	40.75	12.75	1	10.1875	0.79902	10.1875	33.33	16.66	15
HOA	67	Female	6	4.5	0	0	21.42	1.67	12.82	6	57	3	70.97	9.5	0.5	11.8283	1.24509	23.6567	66.66	55.55	25
HOA	72	Male	9	2.5	5	6	25	3.39	7.36	2	40	2	36.16	20	1	18.08	0.904	18.08	50	33.33	20
HOA	84	Female	8	3.8	11	14	13.63	1.49	9.11	3	52	2	46.84	17.3333	0.666667	15.6133	0.900769	23.42
HOA	71	Female	11	3.4	2	4	30	1.44	20.77	3	45	5	49.09	15	1.66667	16.3633	1.09089	9.818
HOA	68	Female	7	2.2	2	2	15	2.1	7.11	2	61	4	50.59	30.5	2	25.295	0.829344	12.6475
HOA	61	Female	9	1.8	1	0	16.66	1.06	15.67	1	29	3	26.98	29	3	26.98	0.930345	8.99333
HOA	67	Female	6	2	2	0	16.66	2.35	7.07	3	61	4	59.44	20.3333	1.33333	19.8133	0.974426	14.86
HOA	81	Female	28	4.1	12	20	30	1.8	16.55	2	82	2	71.99	41	1	35.995	0.877927	35.995
HOA	69	Female	7	3.1	2	0	25	2.97	8.39	4	59	3	72.64	14.75	0.75	18.16	1.23119	24.2133
HOA	60	Male	4	2.7	2	4	25	1.2	20.71	1	33	3	33.7	33	3	33.7	1.02121	11.2333
HOA	64	Female	8	2.8	11	14	18.75	2.39	7.83	6	83	3	78.8	13.8333	0.5	13.1333	0.949398	26.2667	25	11.11	10
HOA	73	Male	15	2.2	0	0	25	4.04	6.18	4	73	2	65.41	18.25	0.5	16.3525	0.896027	32.705	25	33.33	20
HOA	62	Female	17	1.8	4	12	21.42	1.91	11.2	4	57	3	54.73	14.25	0.75	13.6825	0.960175	18.2433	33.33	38.88	20
HOA	62	Female	9	1.6	2	4	37.5	2	18.75	1	28	2	23.87	28	2	23.87	0.8525	11.935
HOA	63	Male	0	1	0	0	18.75	1.48	12.66	1	29	1	22.14	29	1	22.14	0.763448	22.14	0	0	7
HOA	82	Female	22	3.3	13	20	18.75	1.49	12.51	1	43	3	30.98	43	3	30.98	0.720465	10.3267
HOA	70	Male	6	3.1	12	20	37.5	2.53	14.79	2	31	1	28.42	15.5	0.5	14.21	0.916774	28.42
HOA	62	Male	9	2.1	3	2	50	2.48	20.13	1	26	1	22.97	26	1	22.97	0.883462	22.97
HOA	63	Male	7	2.5	12	12	11.53	1.9	6.05	2	45	3	48.11	22.5	1.5	24.055	1.06911	16.0367
HOA	63	Male	7	1.6	2	0	37.5	2.51	14.91	1	26	1	23.74	26	1	23.74	0.913077	23.74
HOA	67	Male	5	2.4	5	0	37.5	3.1	12.08	3	38	1	26.38	12.6667	0.333333	8.79333	0.694211	26.38
HOA	65	Male	10	3.5	2	0	50	2	24.95	1	33	1	20.17	33	1	20.17	0.611212	20.17
HOA	75	Female	24	4.4	14	16	50	3.65	13.69	3	65	2	60.66	21.6667	0.666667	20.22	0.933231	30.33
HOA	78	Female	15	4.4	19	32	50	4.05	12.32	3	89	2	80.6	29.6667	0.666667	26.8667	0.905618	40.3
HOA	61	Male	9	1.5	1	0	18.75	1.87	9.99	5	43	3	43.18	8.6	0.6	8.636	1.00419	14.3933
HOA	75	Male	16	3.4	12	22	37.5	2.79	13.42	2	35	1	26.91	17.5	0.5	13.455	0.768857	26.91
HOA	62	Male	9	1.2	0	0	50	2.35	16.79	2	37	2	31.24	18.5	1	15.62	0.844324	15.62
HOA	64	Male	0	1	0	0	18.75	1.7	10.99	2	23	1	26.28	11.5	0.5	13.14	1.14261	26.28
HOA	83	Female	27	3.7	12	28	25	1.71	14.6	5	101	3	116.6	20.2	0.6	23.32	1.15446	38.8667
HOA	70	Male	5	2.5	2	0	16.66	1.72	9.68	1	44	1	52.4	44	1	52.4	1.19091	52.4
HOA	60	Male	10	1.8	1	6	30	1.48	20.16	1	28	2	19	28	2	19	0.678571	9.5
HOA	70	Male	7	1	0	0	25	1.86	13.39	1	64	1	50.93	64	1	50.93	0.795781	50.93
HOA	62	Female	1	1	0	0	21.42	2.47	8.67	1	31	1	25.6	31	1	25.6	0.825806	25.6
HOA	66	Male	4	1	0	0	13.63	2	10.41	2	57	6	47.4	28.5	3	23.7	0.831579	7.9
HOA	70	Male	9	4.1	5	4	10.71	3	7.09	1	46	5	33.39	46	5	33.39	0.72587	6.678
HOA	73	Female	4	2.1	0	0	25	2.24	11.13	2	27	2	34.95	13.5	1	17.475	1.29444	17.475
HOA	67	Male	24	3	9	10	13.63	1.8	7.54	1	53	1	34.1	53	1	34.1	0.643396	34.1
HOA	76	Male	3	2.3	0	0	30	1.86	16.05	1	50	2	47.04	50	2	47.04	0.9408	23.52
HOA	67	Female	10	1.2	0	0	18.75	1.99	7.89	2	25	3	39.23	12.5	1.5	19.615	1.5692	13.0767
HOA	84	Female	9	5.8	27	22	13.63	2.63	5.16	1	56	3	70.36	56	3	70.36	1.25643	23.4533
HOA	65	Female	6	3.2	1	0	25	1.43	17.46	1	63	1	48.16	63	1	48.16	0.764444	48.16
HOA	66	Male	10	2.3	0	0	30	3.19	9.39	6	56	6	46.16	9.33333	1	7.69333	0.824286	7.69333
HOA	67	Male	9	2.6	9	10	25	2.58	9.67	1	46	1	27.56	46	1	27.56	0.59913	27.56
HOA	80	Male	29	3.6	12	6	7.5	3.07	2.43	4	153	8	82.62	38.25	2	20.655	0.54	10.3275
HOA	60	Male	24	2.6	0	0	30	1.36	17.36	3	43	2	44.4	14.3333	0.666667	14.8	1.03256	22.2
HOA	62	Male	9	1	0	0	37.5	1.41	26.59	1	41	2	31.93	41	2	31.93	0.77878	15.965
HOA	63	Male	10	2	8	10	25	1.67	14.91	2	40	4	59.93	20	2	29.965	1.49825	14.9825
HOA	62	Female	10	2.4	1	0	25	3.51	7.11	3	45	2	45.63	15	0.666667	15.21	1.014	22.815
HOA	62	Female	12	3.7	12	16	9.37	3.43	2.72	5	76	6	73.17	15.2	1.2	14.634	0.962763	12.195
HOA	83	Male	17	1	4	0	30	7.43	4.03	1	53	2	32.26	53	2	32.26	0.608679	16.13
HOA	78	Male	9	1.4	1	4	13.63	2.73	4.98	8	68	3	57.63	8.5	0.375	7.20375	0.8475	19.21
HOA	67	Male	10	4.3	1	2	25	2.21	11.31	1	45	2	59.26	45	2	59.26	1.31689	29.63
HOA	63	Male	18	1.6	0	0	30	2.24	13.35	1	68	3	48.83	68	3	48.83	0.718088	16.2767
HOA	66	Male	10	1	0	0	75	7.4	10.13	1	66	5	68.34	66	5	68.34	1.03545	13.668
HOA	60	Male	3	1	0	0	75	3.68	20.35	2	39	2	40.8	19.5	1	20.4	1.04615	20.4
HOA	69	Female	4	1	0	0	25	2.12	11.78	4	90	5	100.19	22.5	1.25	25.0475	1.11322	20.038
HOA	97	Male	9	2.3	10	14	18.75	1.35	13.79	8	77	2	66.93	9.625	0.25	8.36625	0.869221	33.465
HOA	87	Male	18	3	9	10	21.42	12.14	2.05	2	76	1	66.11	38	0.5	33.055	0.869868	66.11
HOA	84	Female	23	1.3	8	6	12.5	2.15	5.79	7	61	1	59.66	8.71429	0.142857	8.52286	0.978033	59.66
HOA	80	Female					18.75	4.72	3.96	3	47	3	47.92	15.6667	1	15.9733	1.01957	15.9733
HOA	79	Female					21.42	2.17	9.84	4	39	1	27.24	9.75	0.25	6.81	0.698462	27.24
HOA	71	Female					25	2.16	11.56	3	77	5	87.53	25.6667	1.66667	29.1767	1.13675	17.506
